# Supplementary material for: Shape-stabilized phase-change materials supported by eggplant-derived porous carbon for efficient solar-to-thermal energy conversion and storage
Source: Royal Society of Chemistry journal article supplement (doi:10.1039/c9se01272a), 2020-01-01
Supplement: c9se01272a1.pdf [file c9se01272a1.pdf]

**Electronic Supplementary Information for**

**Shape-stabilized phase change materials supported by eggplants-  
derived porous carbon for efficient solar-to-thermal energy  
conversion and storage**

Yaqiong Li, Xiubing Huang\*, Yang Li, Zuoshuai Xi, Guangtong Hai, Zhang Tao, and  
Ge Wang\*

Beijing Key Laboratory of Function Materials for Molecule & Structure Construction,  
School of Materials Science and Engineering, University of Science and Technology  
Beijing, Beijing 10083, PR China

Corresponding authors

Email: xiubinghuang@ustb.edu.cn (X. Huang) and gewang@mater.ustb.edu.cn (G.  
Wang)

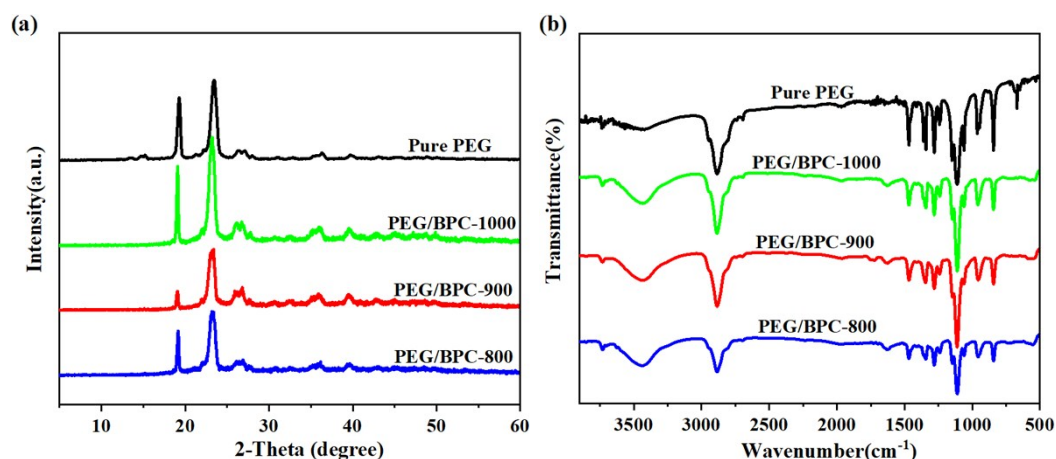

**Figure S1.** (a) XRD patterns of PEG and the prepared PEG/BPC ss-CPCM (b) FT-IR spectrums of PEG and the prepared PEG/BPC ss-CPCM.

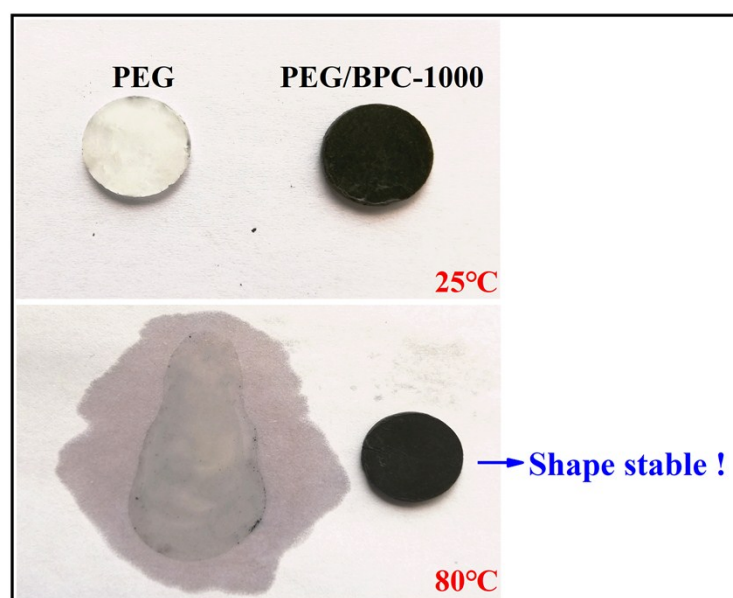

**Figure S2.** The digital photograph of PEG and PEG/BPC-1000 before and after heating at 80°C.

Fig. S2 shows the photographs of the PEG and PEG/BPC-1000 before and after being heating up to 80°C. After being heated to above its melting temperature, the PEG melted completely into liquid. At the same time, the surface of PEG/BPC-1000 was moist due to the melting of the PEG, but no liquid leakage from the composites was observed.

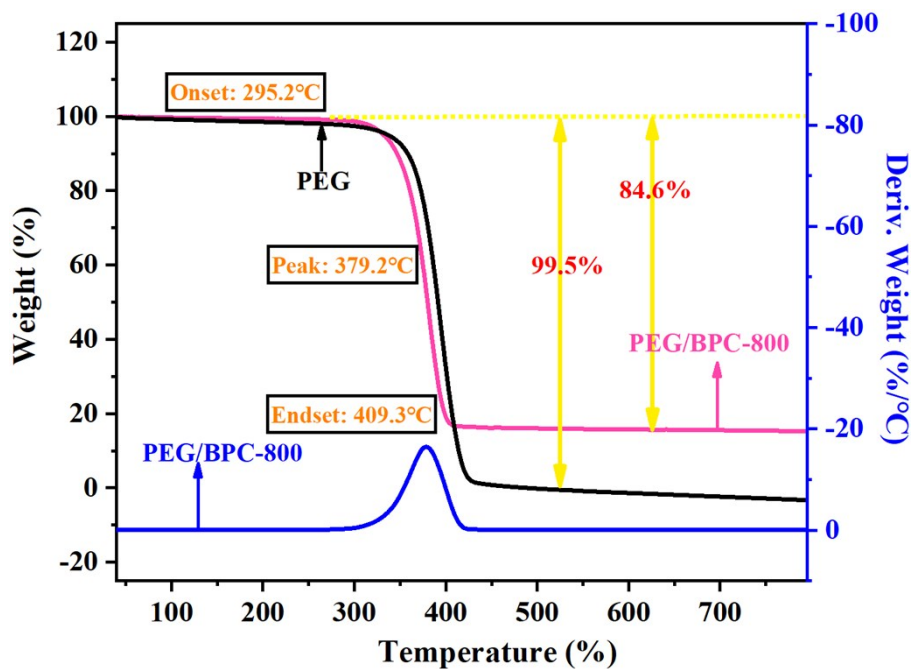

Figure S3. TGA curves of pure PEG and PEG/BPC-800 ss-CPCM and the corresponding DTG thermograms of PEG/BPC-800 ss-CPCM.

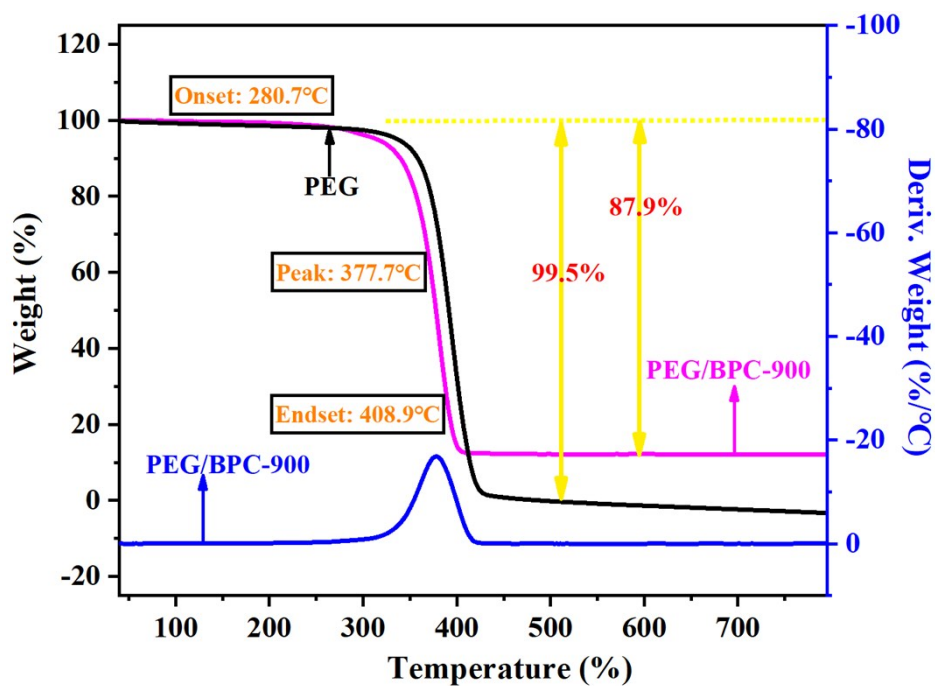

Figure S4. TGA curves of pure PEG and PEG/BPC-900 ss-CPCM and the corresponding DTG thermograms of PEG/BPC-900 ss-CPCM.

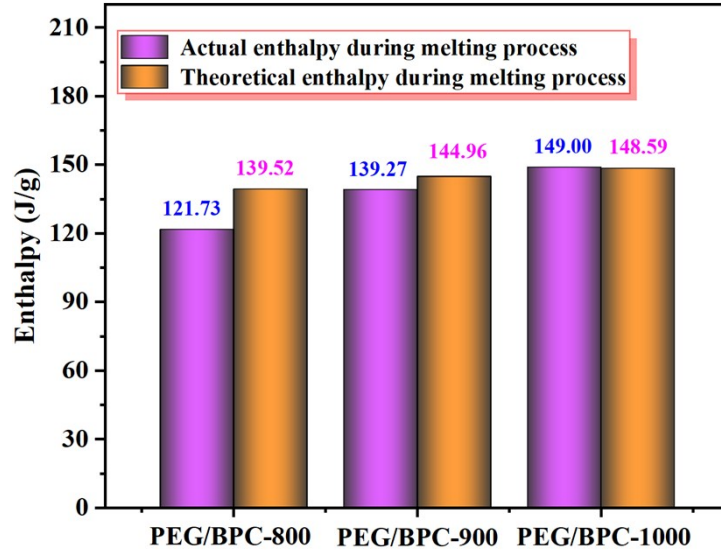

**Figure S5.** Comparison of theoretical enthalpy and actual enthalpy during melting process.

The absolute crystallinity ( $F_c$ ) of the PCMs in the phase change composite materials can be calculated by the formula (1),

$$F_c = \frac{\Delta H_{\text{PCM}}}{\Delta H_{\text{Pure}}\beta} \quad (1)$$

where  $\Delta H_{\text{Pure}}$  and  $\Delta H_{\text{PCM}}$  are the melting latent heat of the core material and the phase change composite material, respectively;  $\beta$  represents the contents of the PEG material in PEG/BPC ss-CPCMs. The crystallinity of PEG/BPC-800, and PEG/BPC-900, and PEG/BPC-1000 ss-CPCMs was calculated to be 87.24%, 96.07%, 100.27% in melting process, as shown in Figure S6.

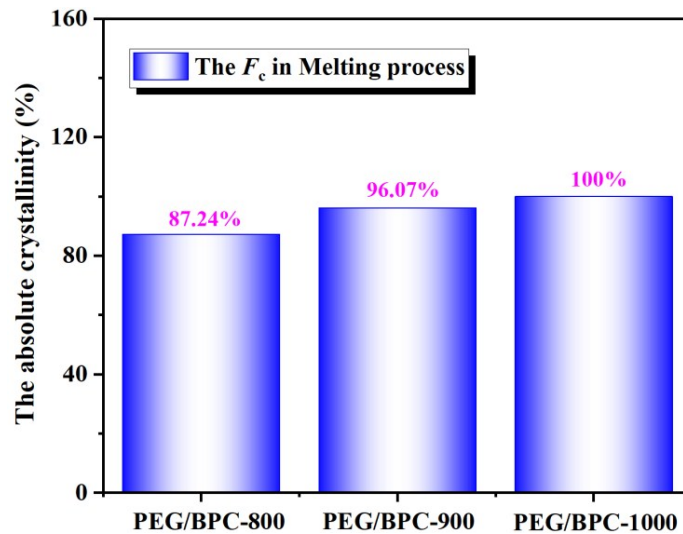

**Figure S6.** The absolute crystallinity comparison diagram melting and solidify

processes.
